# Supplementary material for: Lentiviral vector induces high-quality memory T cells via dendritic cells transduction
Source: PubMed Central journal article supplement (PMC8192903; doi:10.1038/s42003-021-02251-6), 2021-06-10
Supplement: 42003_2021_2251_MOESM3_ESM.pdf [file 42003_2021_2251_MOESM3_ESM.pdf]

## **Description of Additional Supplementary Files**

**File name:** Supplementary Data 1

**Description:** All source data underlying the graphs presented in the main figures in Excel format.
